# Supplementary material
Source: PubMed Central journal article supplement (PMC2875865)
Supplement: NIHMS191435-supplement-1.pdf [file NIHMS191435-supplement-1.pdf]

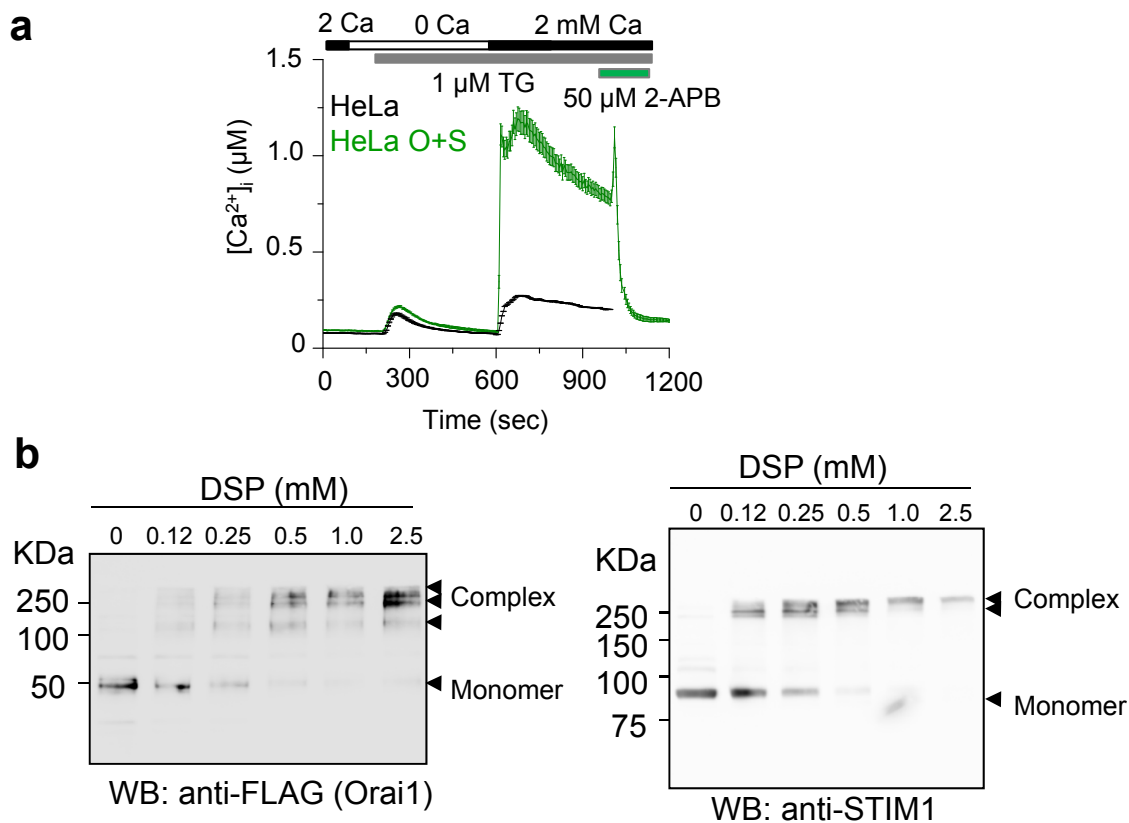

**Figure S1** Measurement of store-operated  $\text{Ca}^{2+}$  entry (SOCE) in HeLa O+S cells and detection of high MW protein complexes containing Orai1 and STIM1 by DSP cross-linking. **(a)** Control HeLa cells or HeLa cells stably expressing Orai1 and STIM1 (HeLa O+S) were examined for SOCE. Inhibition of CRAC channel activity was monitored

using 2-APB ( $50 \mu\text{M}$ ). Each trace represents average  $\pm$  s.e.m from 50-60 cells. **(b)** HeLa O+S cells were treated with different concentrations of DSP for one hour. Cell lysates were cleared by ultracentrifugation and analyzed by non-reducing SDS-PAGE and immunoblotted with anti-FLAG (Orai1, left) or anti-STIM1 (right) antibodies.

|            |                |                        |                           |                           |                        |             |                          |                         |                         |               |                  |                 |         |
|------------|----------------|------------------------|---------------------------|---------------------------|------------------------|-------------|--------------------------|-------------------------|-------------------------|---------------|------------------|-----------------|---------|
| Human      | MAAPDGRVVS     | RQRLGQGSGGPKGSGAC      | LHPLD                     | SL                        | EQKETQEQT              | SGQLVMLRKAQ | EFFQ                     | 60                      |                         |               |                  |                 |         |
| Chimpanzee | MAAPDGRVVS     | RQRLGQGSGGPKGSGAC      | LHPLD                     | SL                        | EQKETQEQT              | SGQLVMLRKAQ | EFFQ                     | 60                      |                         |               |                  |                 |         |
| Mouse      | MATPSGREDSS    | Q---TPGHGKQGS          | GAC                       | VEQLDHPEK                 | LEVEMPD--              | QSAMWKK     | AQEFFQ                   | 54                      |                         |               |                  |                 |         |
| Zebra fish | MASFTSTCGSKVD  | -----RGS               | SHR                       | GDSK                      | GP                     | SESD-----   | CSAVIEK                  | TREFFQ 43               |                         |               |                  |                 |         |
|            |                | <b>EF hand motif 1</b> | <b>Tropomyosin domain</b> |                           | <b>EF hand motif 2</b> |             |                          |                         |                         |               |                  |                 |         |
| Human      | TC             | <b>DAEGKGF</b> IARKD   | MQRLH                     | KELPLS                    | LEELEDV                | FDA         | <b>DADNGYLTPQE</b>       | FTTGFSHFFFSQ 120        |                         |               |                  |                 |         |
| Chimpanzee | TC             | <b>DAEGKGF</b> IARKD   | MQRLH                     | KELPLS                    | LEELEDV                | FDA         | <b>DADNGYLTPQE</b>       | FTTGFSHFFFSQ 120        |                         |               |                  |                 |         |
| Mouse      | TC             | <b>DSEGKGF</b> IARTD   | MQRLH                     | QELPLS                    | LEELEDV                | FDA         | <b>DADNGFLTPQE</b>       | FTTGFSHFFFSQ 114        |                         |               |                  |                 |         |
| Zebra fish | IC             | <b>DVEGKGF</b> ITRRD   | MQRLN                     | GELPLS                    | AD                     | LENV        | FDSI <b>DADANGYLTFEE</b> | FSSGFSEFMFGP 103        |                         |               |                  |                 |         |
| Human      | NNPSQEDVG--    | EQVAQR                 | HEEKVY                    | LSRGDED                   | LDGMGK                 | DEEAQ       | FRMLMDRLGAQ              | KVLEDES 178             |                         |               |                  |                 |         |
| Chimpanzee | NNPSQEDAG--    | EQVAQR                 | HEEKVY                    | LSRGDED                   | LDGMGE                 | DEEAQ       | FRMLMDRLGAQ              | KVLEDES 178             |                         |               |                  |                 |         |
| Mouse      | NIQGEEDAD--    | QQVAQL                 | QEEKVY                    | QSRGEED                   | VGDM                   | MDHDEEAQ    | FQMLMDRLGAQ              | KVLEDES 172             |                         |               |                  |                 |         |
| Zebra fish | SVVPADPHG      | EELVSR                 | KSP                       | EMLYESQ                   | WEERL                  | SRGEDDEE    | EKF                      | CMLMENLGASNI            | FEDPEE 163              |               |                  |                 |         |
|            |                |                        |                           | <b>Coiled-coil domain</b> |                        |             |                          |                         |                         |               |                  |                 |         |
| Human      | VKQLWLQLK      | KEE                    | PHLLSN                    | FEDFL                     | TRIS                   | SQLQEA      | HEEKNELE                 | CALRKKIAAYDEEIQHLYE 238 |                         |               |                  |                 |         |
| Chimpanzee | VKQLWLQLK      | KEE                    | PHLLSN                    | FEDFL                     | TRIS                   | SQLQEA      | HEEKNELE                 | CALRKKIAAYDEEIQHLYE 238 |                         |               |                  |                 |         |
| Mouse      | VRQLWLQLR      | KDE                    | PHLLSN                    | FEDLL                     | TTIFA                  | QLQEA       | HEEKNELE                 | CALRKKIAAYDEEIQHLYE 232 |                         |               |                  |                 |         |
| Zebra fish | VRSLWVQLR      | RDE                    | PHLLSN                    | FEFLA                     | RVTYQ                  | IK          | EANQ                     | EKKEMETALR              | KRSATHDEIQRLYE 223      |               |                  |                 |         |
|            |                |                        |                           | <b>Tropomyosin domain</b> |                        |             |                          |                         |                         |               |                  |                 |         |
| Human      | EMEQQIKSEKE    | <b>QFLLKDT</b>         | ERFQARS                   | Q                         | EL                     | QKLLCKE     | Q                        | EL                      | QLTQKQRLEGQCTALHHDK 298 |               |                  |                 |         |
| Chimpanzee | EMEQQIKSEKE    | <b>QFLLKVT</b>         | LP                        | SVSRG                     | QDWRN                  | PLLCQ       | GK                       | SECF                    | SRKSGRLEGQCTALHHDK 298  |               |                  |                 |         |
| Mouse      | EMEQQIKSERE    | <b>QFLLKDT</b>         | ERFQARS                   | RELEK                     | KL                     | SAKE        | Q                        | EL                      | ERLNQKQ-RKVG            | YCGDIVG-- 289 |                  |                 |         |
| Zebra fish | EMEQQIKNEK     | DRILLE                 | DSERFL                    | TRS                       | QDMEH                  | QLLSKE      | KELE                     | IL                      | SNKQKRLERQCRDLLSEQ 283  |               |                  |                 |         |
|            |                |                        |                           | <b>Tropomyosin domain</b> |                        |             |                          |                         |                         |               |                  |                 |         |
| Human      | HETKAENTK      | LKLTN                  | QELARE                    | LERTS                     | WELQ                   | DAQ         | QQL                      | LES                     | LQ                      | Q             | EACKLHQEKEMEVYRV | TESL 358        |         |
| Chimpanzee | HETKAENTK      | LKLTN                  | QELARE                    | LERTS                     | WELQ                   | DAQ         | QQL                      | LES                     | LQ                      | Q             | EACKLHQEKEM      | ----- 349       |         |
| Mouse      | ----           | PQLF                   | QLSLP                     | ---                       | L                      | PHAL        | HHS                      | S                       | M                       | D             | F                | ----- 310       |         |
| Zebra fish | RETSVENV       | KLKRY                  | NEDLS                     | RE                        | L                      | DHTS        | Q                        | EL                      | SLA                     | Q             | ELMLLQEQSSRL     | HEEREM----- 334 |         |
| Human      | QREKAGLLK      | QLD                    | FLRC                      | VG                        | GH                     | WP          | VLR                      | AP                      | PR                      | SL            | G                | SE              | GPV 395 |
| Chimpanzee | -----          |                        |                           |                           |                        |             |                          |                         |                         |               |                  |                 |         |
| Mouse      | -----          |                        |                           |                           |                        |             |                          |                         |                         |               |                  |                 |         |
| Zebra fish | -----          |                        |                           |                           |                        |             |                          |                         |                         |               |                  |                 |         |
| Human      | NP_116069.1    |                        |                           |                           |                        |             |                          |                         |                         |               |                  |                 |         |
| Chimpanzee | XP_001156341   |                        |                           |                           |                        |             |                          |                         |                         |               |                  |                 |         |
| Mouse      | NP_001028636   |                        |                           |                           |                        |             |                          |                         |                         |               |                  |                 |         |
| Zebra fish | XP_001922837.1 |                        |                           |                           |                        |             |                          |                         |                         |               |                  |                 |         |

**Figure S2** Amino acid sequence alignment of CRACR2A from various species. Amino acid sequences of human, chimpanzee, mouse and zebrafish CRACR2A proteins were aligned using ClustalW2 (default options). The predicted conserved EF-hands are colored in light blue (predicted using SMART). The predicted coiled-coil sequence (Human Protein Reference Database and COILS) in the C terminus is boxed in gray and tropomyosin domains predicted using PRINTS are highlighted in blue. The CRACR2A peptide detected from mass spectrometry is

shown in red. This peptide was detected in a gel fragment corresponding to MW of ~45 kDa as described in Fig. 1. In humans, three alternative transcripts of CRACR2A (NM\_001144958.1, NM\_001144959.1 and NM\_032680.3) were identified. Proteins derived from three isoforms are identical in their first 372 amino acids with differences in their C-terminal sequences. Amino acids sequences corresponding to isoform c of CRACR2A (predicted MW; 45.6 kDa, Compute pI/Mw tool) have been aligned here.

**a**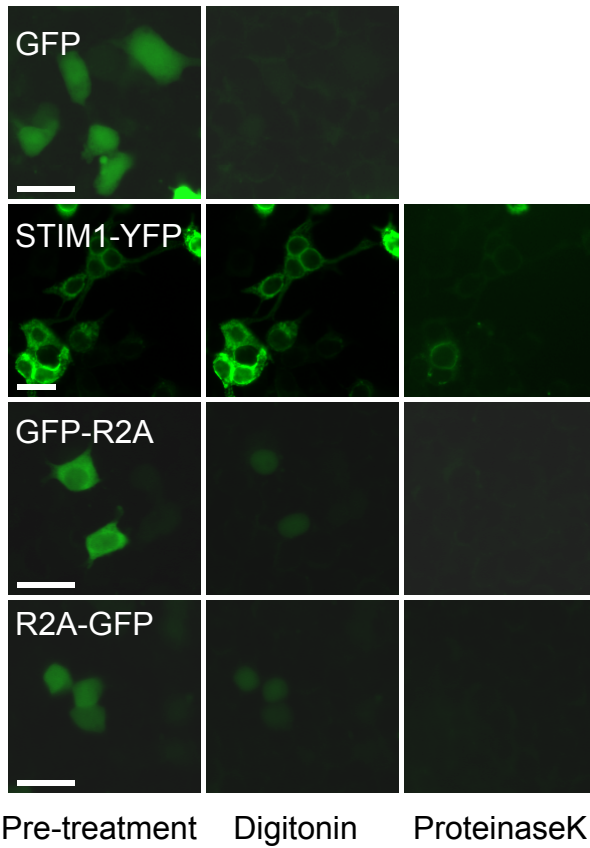**b**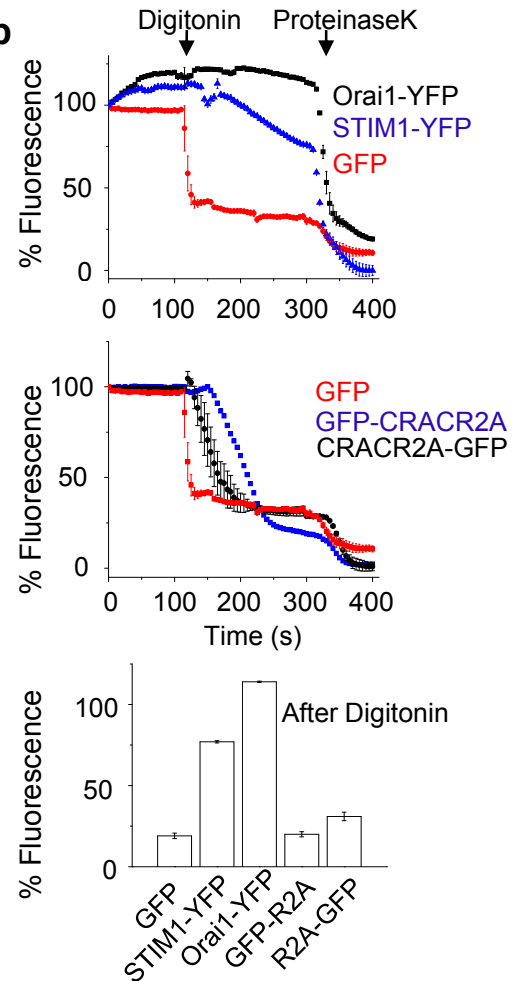

**Figure S3** CRACR2A is a cytosolic protein as judged by fluorescence protease protection (FPP) assay. **(a)** HEK293 cells expressing either N- or C-terminally GFP-tagged CRACR2A proteins were treated with digitonin to permeabilize the cells and allow for diffusion of cytoplasmic proteins outside the cell. Subsequent treatment of cells with proteinase K leads to degradation of GFP tags exposed to the cytoplasm and thereby reduction in fluorescence. STIM1-YFP and Orai1-YFP used as controls for proteins integral to the

ER and plasma membrane respectively, showed reduction in fluorescence upon proteinase K treatment (top graph) due to cytoplasmic localization of their YFP tags. Bar, 20  $\mu$ m **(b)** Graphical representation of the images shown in panel a. The initial intensity of fluorescence was set to 100%. Each trace represents average  $\pm$  s.e.m from 30-50 individual cells. The bar graph shows average  $\pm$  s.e.m from three different experiments.

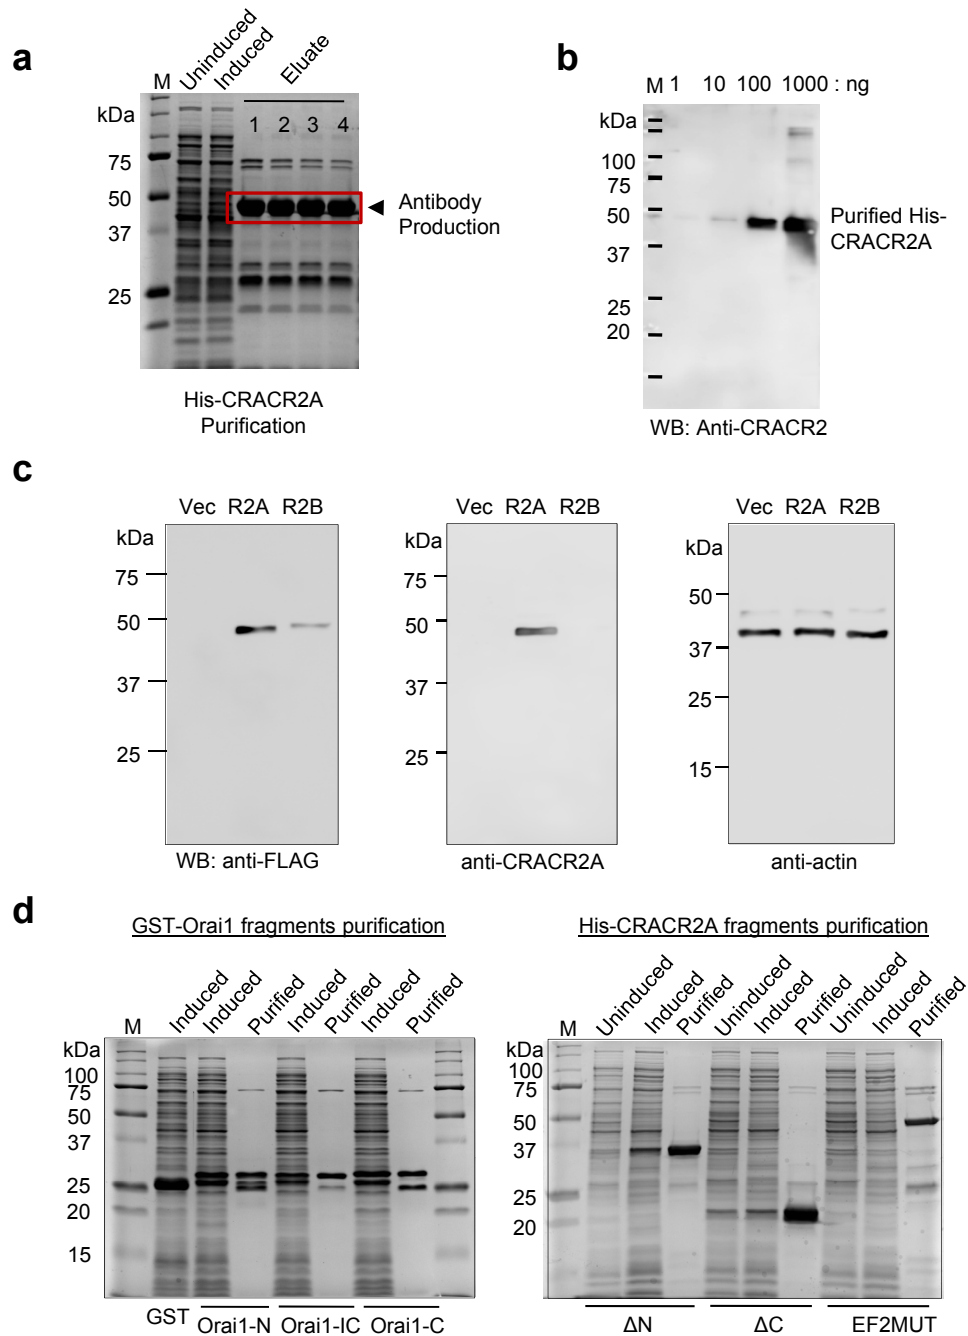

**Figure S4** Purification of recombinant CRACR2A and Orai1 proteins and generation of anti-CRACR2A antibodies. (a) *E. coli* expressing 6X His-tagged CRACR2A proteins were either left uninduced or induced with 0.2 mM IPTG, and lysates were analyzed for CRACR2A expression. Eluates show purified CRACR2A protein (red box). The purified protein bands were excised to generate anti-CRACR2A antibody. Proteins were detected by coomassie blue staining. (b) Polyclonal antibody against CRACR2A generated in rabbits was examined for sensitivity to detect purified CRACR2A protein. (c) Examination of specificity of CRACR2A antibody. Lysates from HEK293 cells expressing either empty vector (Vec), CRACR2A, or CRACR2B were examined by immunoblotting with anti-FLAG

antibody to detect both proteins (left), with CRACR2A antibody that detects only CRACR2A protein (middle panel), and with anti-actin antibody (right panel) as a loading control. (d) Lysates of *E. coli* expressing either GST or the N terminus (Orai1-N), the intracellular loop (Orai1-IC) or the C-terminus (Orai1-C) of Orai1 were separated by SDS-PAGE (labeled as induced) together with purified fragments (labeled as purified) and visualized by coomassie blue staining (left). Lysates of *E. coli* expressing 6X His-tagged truncation or point mutants of CRACR2A proteins were analyzed by SDS-PAGE and coomassie blue staining (right). Uninduced, induced cell lysates and proteins purified using Ni<sup>2+</sup> resins were examined. M, molecular weight marker.



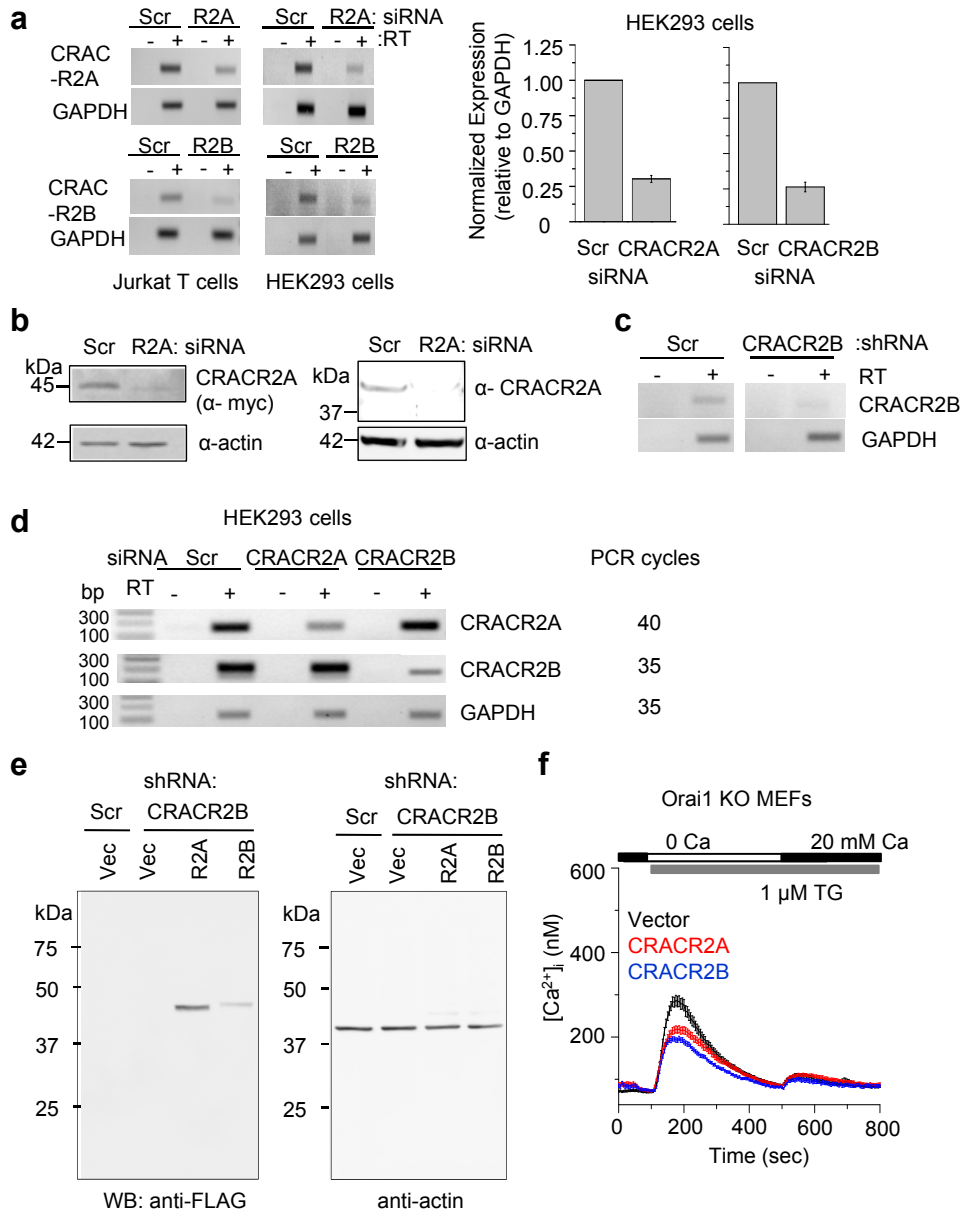

**Figure S6** Knockdown efficiency of siRNAs and shRNAs targeting CRACR2A and CRACR2B in Jurkat T cells and HEK293 cells. **(a)** Jurkat T cells and HEK293 cells were transfected with siRNAs targeting CRACR2A or CRACR2B. The mRNA levels were visualized by agarose gel electrophoresis (left) and quantified (bar graph) using Multi-Gauge software (Fuji film). GAPDH-normalized mRNA levels are plotted relative to those in control cells. In HEK293 cells, CRACR2A transcripts were amplified using higher PCR cycles (40 as compared to 35 for all the other samples). RT stands for addition of reverse transcriptase during cDNA synthesis. **(b)** HEK293 cells stably expressing Myc-CRACR2A were transfected with scrambled siRNA (Scr) or siRNA targeting CRACR2A. Subsequent analysis of CRACR2A expression using immunoblot with anti-Myc antibody shows decreased CRACR2A expression in siRNA treated

cells (left). Jurkat T cells transfected with control or CRACR2A-targeting siRNA were examined by immunoblotting using anti-CRACR2A antibody (right). Immunoblots with anti-actin antibody were used as a loading control. **(c)** HEK293 cells stably expressing control (Scr) or CRACR2B-targeting shRNA were examined for expression of CRACR2B transcripts. **(d)** Cross reactivity of siRNAs targeting transcripts of CRACR2A and CRACR2B were examined in HEK293 cells. **(e)** HEK293 cells stably expressing shRNA were transfected with plasmids encoding FLAG-tagged CRACR2A or CRACR2B cDNAs and immunoblotted using anti-FLAG antibody (left panel). Vec depicts lysates from cells transfected with empty vector. **(f)** Orai1-null MEFs were transduced with retroviruses encoding empty vector, CRACR2A, or CRACR2B cDNAs and SOCE was measured. Each trace is average  $\pm$  s.e.m of 25-35 individual MEFs.

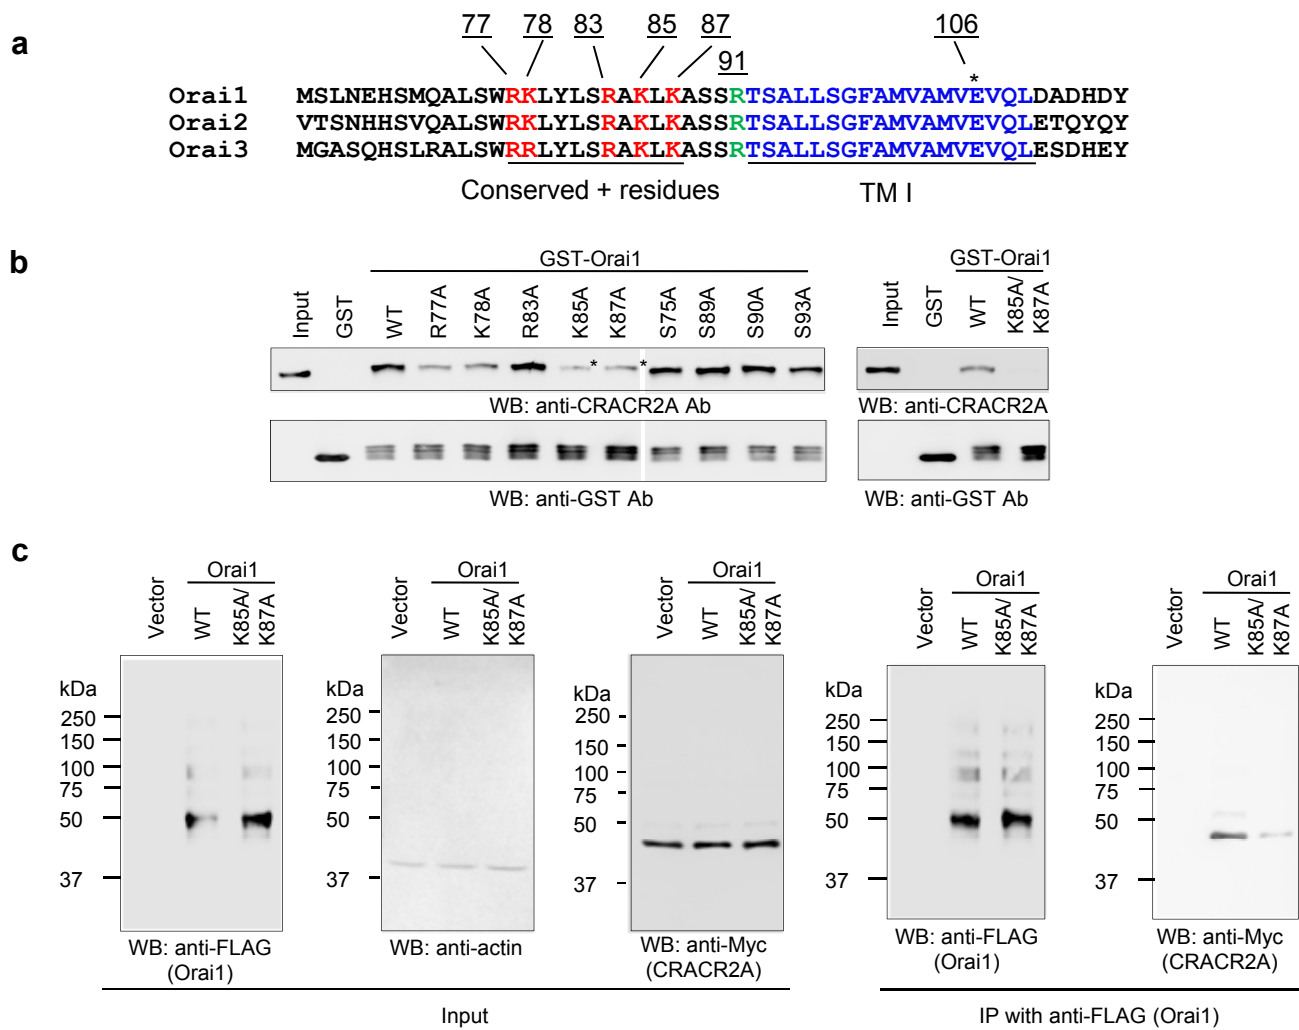

**Figure S7** The positively charged residues K85 and K87 in the N terminus of Orai1 are important for interaction with CRACR2A. **(a)** Alignment of the N-terminal residues of human Orai proteins shows conservation of the positively charged lysine and arginine residues (labeled in Red). Arg91 (R91) is the residue mutated to Trp (R91W) in human SCID patients (green). The first transmembrane segment (TM I) and the pore residue, E106 are indicated in blue and asterisk (\*), respectively. **(b)** GST pull-down assays with wild-type and mutant Orai1 N terminus fragments. In addition to the positively charged residues, the conserved serine residues were examined for their role in CRACR2A binding (left). Pull-down with the N terminus of Orai1<sup>K85A/K87A</sup> double mutant shows minimal binding to CRACR2A

(right). Lower panels show the amount of GST fusion proteins using immunoblots. All the GST-fused WT, mutant Orai1 fragments, and full-length CRACR2A proteins were purified from *E. coli*. **(c)** HeLa cells stably expressing STIM1 were transfected with plasmids encoding Myc-CRACR2A together with either WT Orai1 or Orai1<sup>K85/K87A</sup> mutant. After 48 h, cells were treated with 1  $\mu$ M thapsigargin, cross-linked with DSP and examined by immunoblotting for expression of WT Orai1, Orai1<sup>K85/K87A</sup> and CRACR2A (Input). Middle panel shows input levels using immunoblot with anti-actin antibody. After immunoprecipitation with anti-FLAG resin, precipitates were analyzed by immunoblotting with anti-FLAG and anti-Myc antibodies for detection of Orai1 and CRACR2A, respectively (IP).



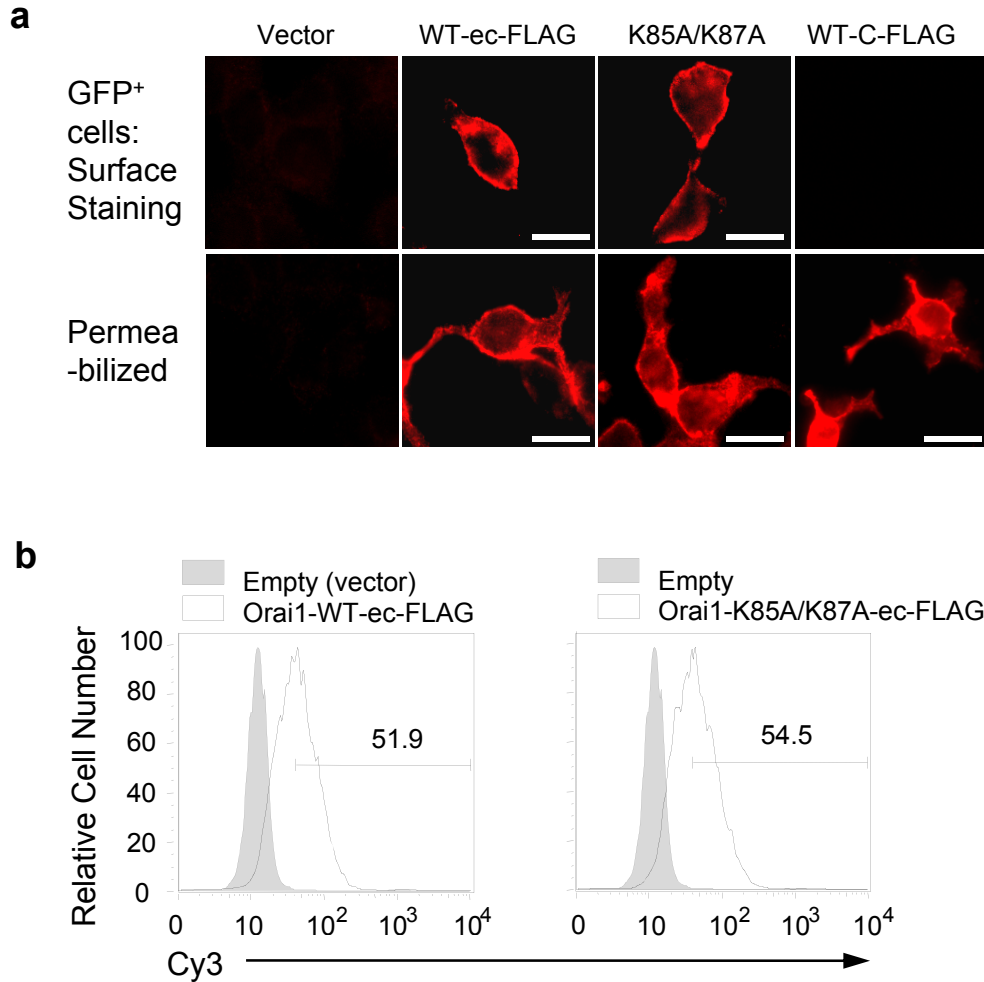

**Figure S8** Examination of the expression levels of WT Orai1 and Orai1<sup>K85A/K87A</sup> proteins. **(a)** HEK293 cells expressing either wild-type (WT-ec-FLAG) or Orai1<sup>K85A/K87A</sup> mutant (K85A/K87A) with a FLAG epitope inserted between TM III and IV were left unpermeabilised (top panel) or permeabilised (bottom panel) and immunostained for detection of Orai1. As a control for surface staining, HEK293

cells were transfected with a plasmid encoding C-terminally FLAG-tagged Orai1 (WT-C-FLAG). Bar, 10  $\mu$ m. **(b)** HEK293 cells expressing either WT or Orai1<sup>K85A/K87A</sup> mutant were permeabilized, stained for Orai1, and examined using flow cytometry. Since this plasmid also expressed GFP from IRES site, only GFP<sup>+</sup> population was gated for analysis. At least 30,000 events were collected for each sample.





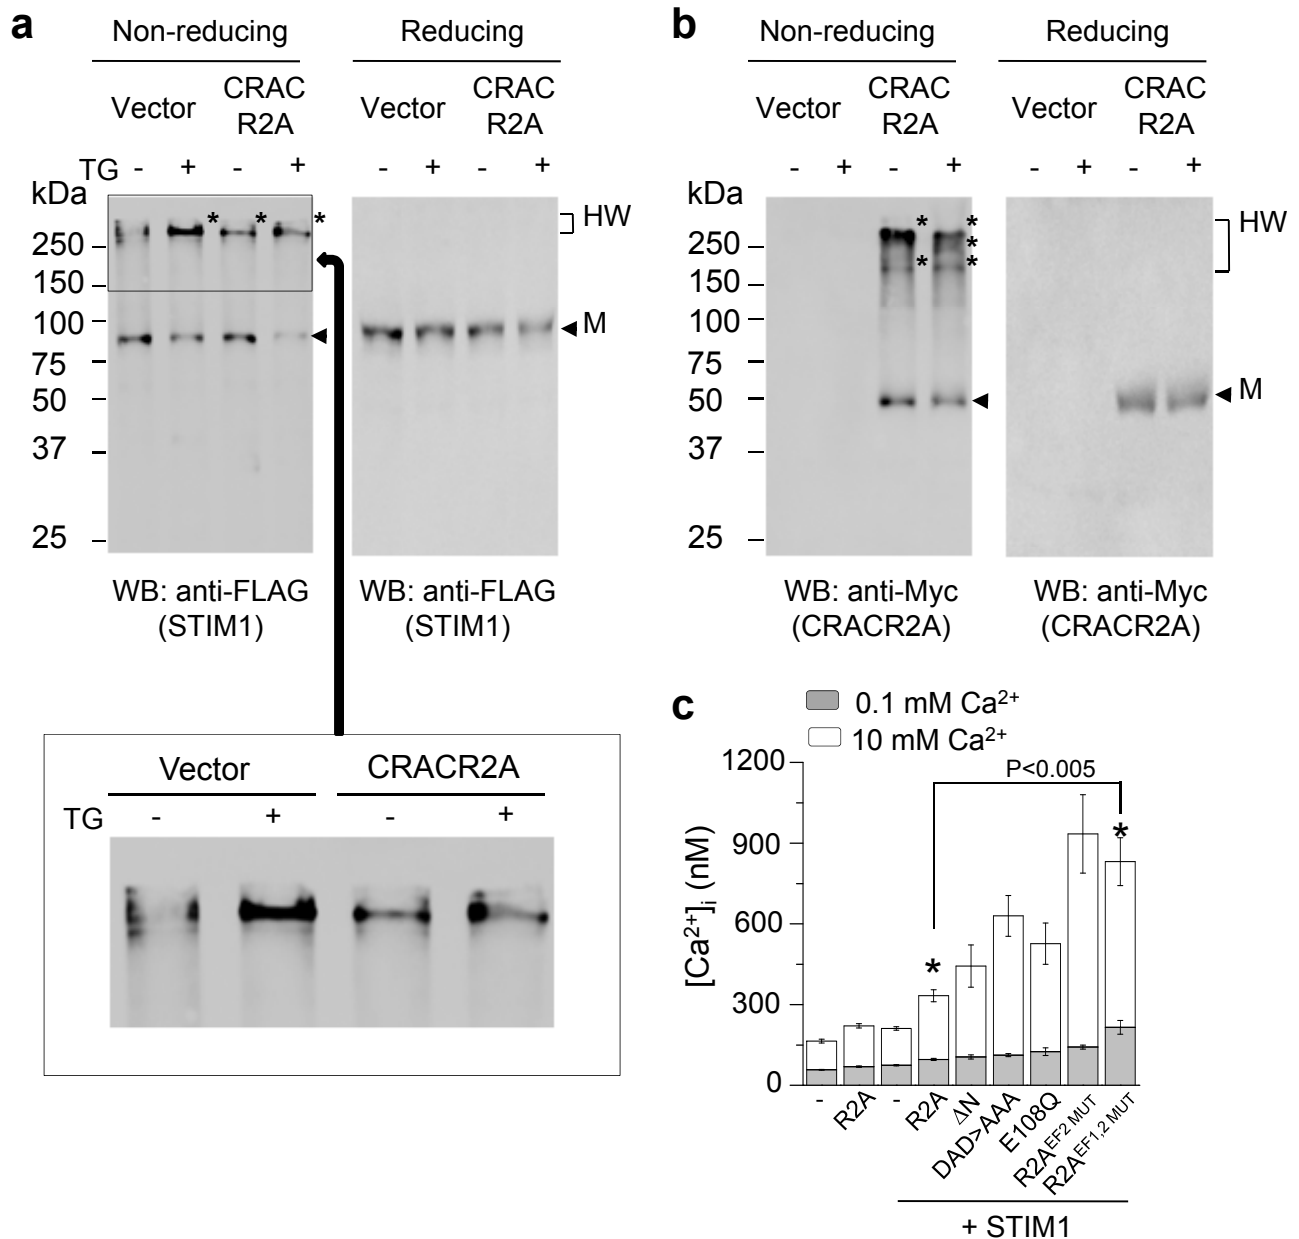

**Figure S10** Co-expression of CRACR2A induces formation of high MW protein complex of STIM1. HEK293 cells expressing FLAG-STIM1 and Myc-CRACR2A were left untreated or treated with thapsigargin and cross-linked for 1 h using 0.1 mM DSP. After lysis, cellular extracts were cleared by ultracentrifugation, separated by SDS-PAGE under non-reducing or reducing conditions and immunoblotted using anti-FLAG (STIM1, **a**) or anti-Myc (CRACR2A, **b**) antibodies. Magnified inset shows distinct high MW protein bands (HW, indicated as \*) of STIM1 after store depletion and presence of similar bands in the samples from cells

overexpressing CRACR2A without store depletion. Immunoblots under reducing conditions serve as loading controls for STIM1 and CRACR2A. M indicates the monomeric form. (**c**) Measurement of cytoplasmic [Ca<sup>2+</sup>]<sub>i</sub> in the absence of ER Ca<sup>2+</sup> depletion. HEK293 cells expressing STIM1 along with various CRACR2A mutants were examined for cytoplasmic Ca<sup>2+</sup> in the presence of Ringer solution containing 0.1 or 10 mM CaCl<sub>2</sub> ions. \* indicate samples with statistically significant differences in 0.1 and 10 mM Ca<sup>2+</sup> containing solution (P < 0.005 by t-test). Data represent average ± s.e.m from three independent experiments.

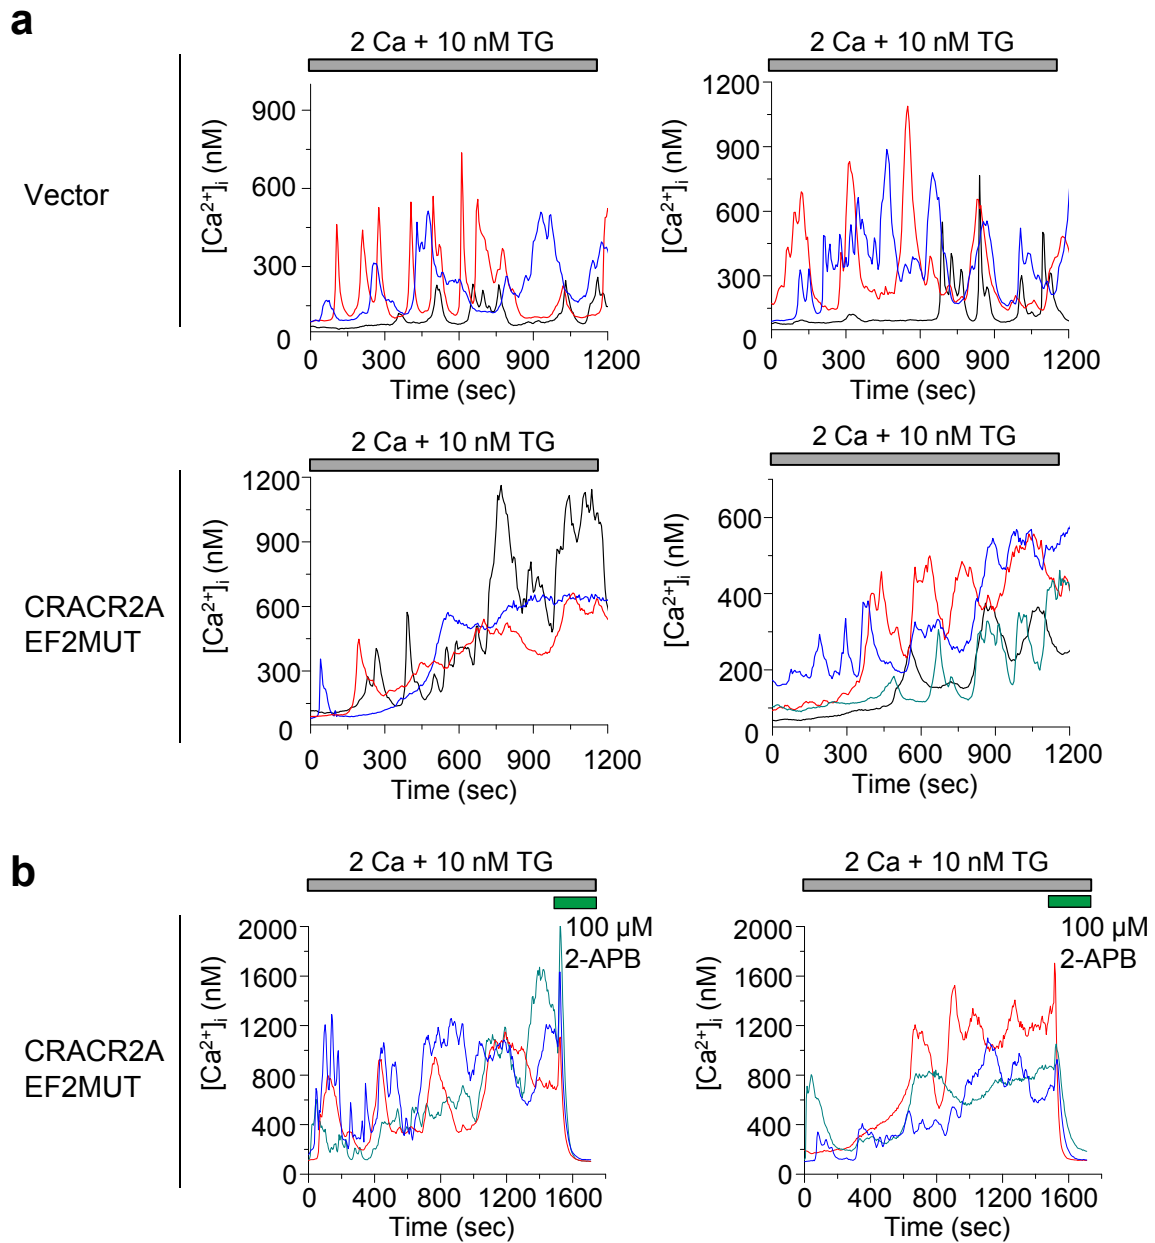

**Figure S11** Expression of CRACR2A<sup>EF2MUT</sup> in Jurkat T cells disrupts Ca<sup>2+</sup> oscillations induced by CRAC channels. **(a)** Jurkat T cells expressing mCherry (Vector) or mCherry-fused CRACR2A<sup>EF2MUT</sup> were treated with 10 nM thapsigargin in the presence of 2 mM external Ca<sup>2+</sup> solution to induce asynchronous [Ca<sup>2+</sup>]<sub>i</sub> oscillations. Graphs show raw traces of representative individual cells expressing either the

empty vector (top, n = 6) or CRACR2A<sup>EF2MUT</sup>-mCherry (bottom, n = 7). **(b)** Addition of 100 μM 2-APB inhibits oscillations induced by 10 nM thapsigargin in Jurkat cells expressing CRACR2A<sup>EF2MUT</sup>. Raw traces of 6 representative individual cells expressing CRACR2A<sup>EF2MUT</sup> are shown.

Fig. 1b

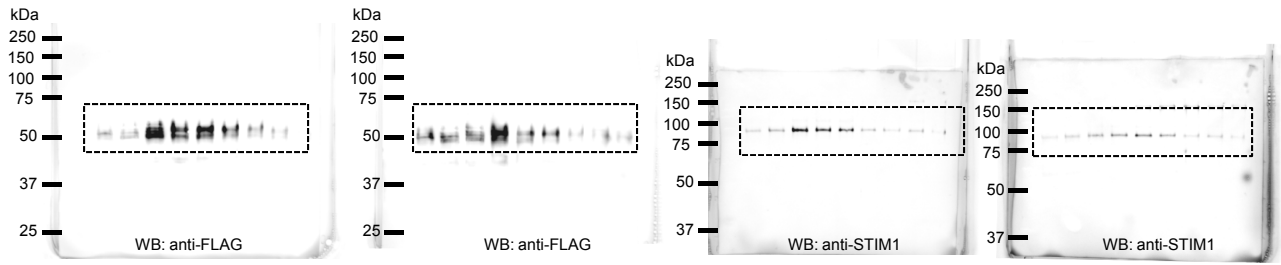

Fig. 2a, left

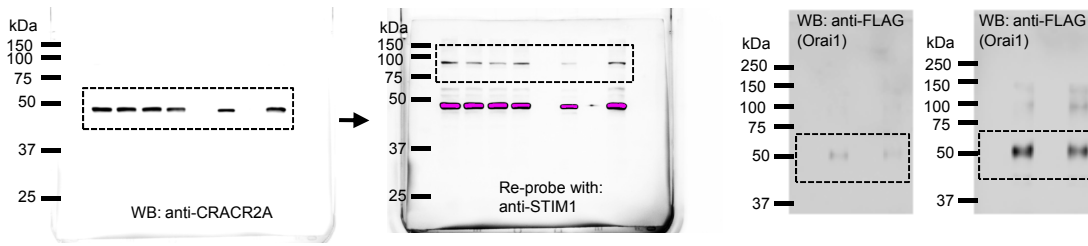

Fig. 2a, right

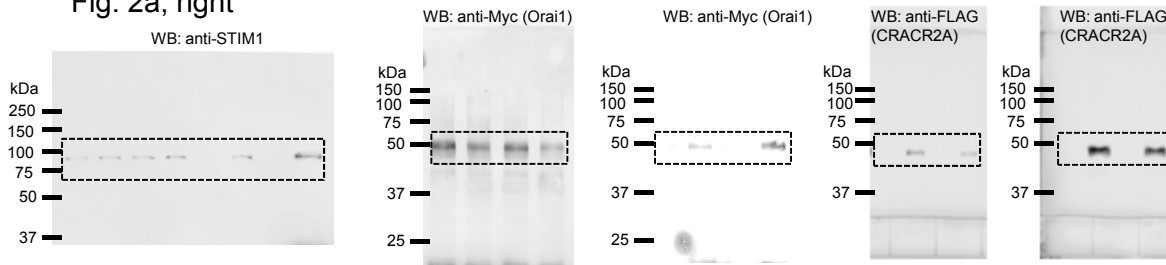

Fig. 2b, left

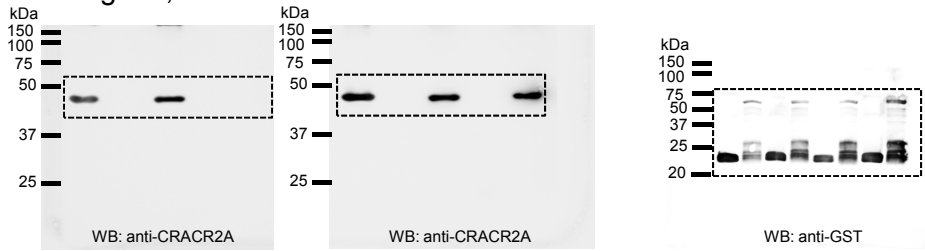

Fig. 2b, right

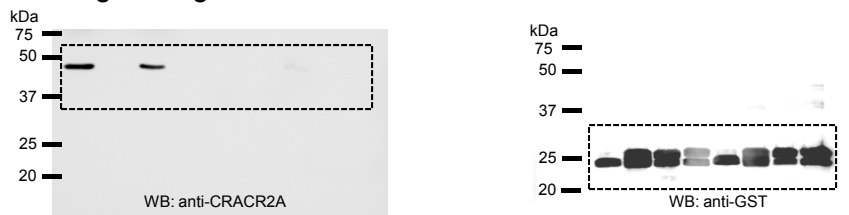

Figure S12 Full scans of key western blot data

Fig. 2c

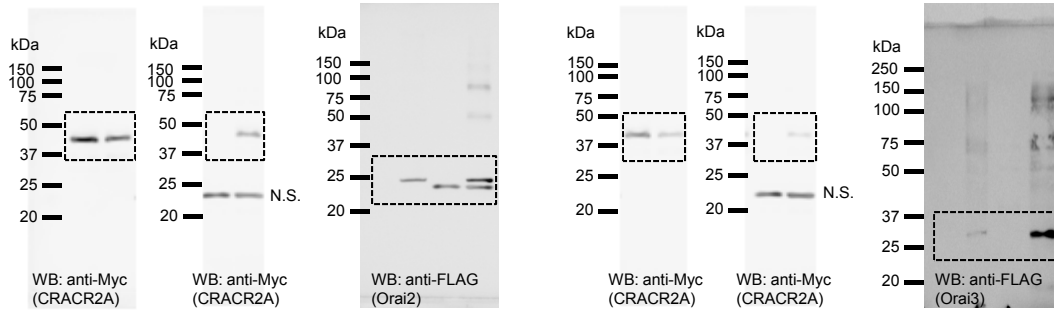

Fig. 2d

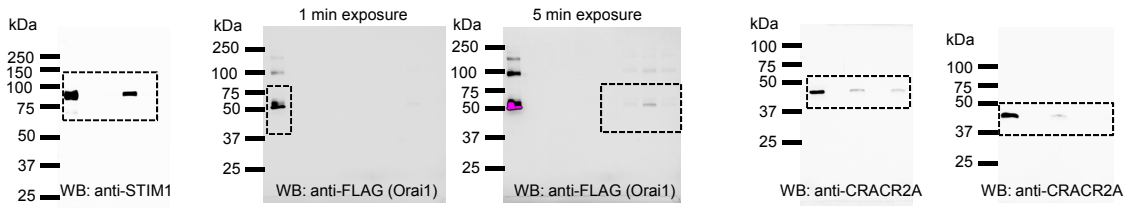

Suppl. Fig. 7b

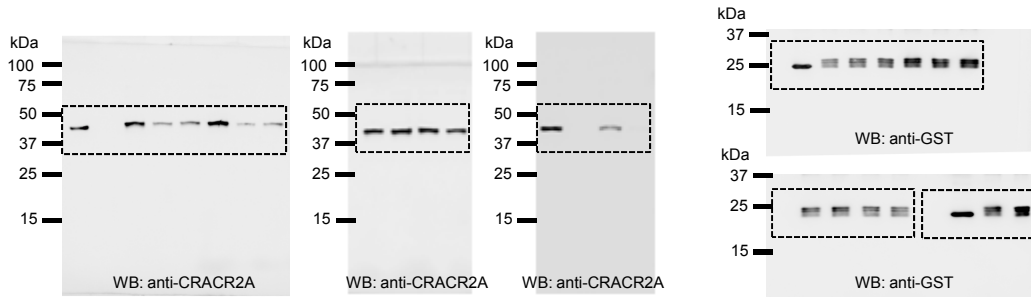

**Supplemental Table 1.**

| Clone name                                                            | Forward Primer Sequence                                   | Reverse Primer Sequence                                   | PCR template                                                                    |
|-----------------------------------------------------------------------|-----------------------------------------------------------|-----------------------------------------------------------|---------------------------------------------------------------------------------|
| pEGFP-N1-CRACR2A                                                      | CGC CTC GAG ATG GCT<br>GCC CCT GAC GGG AGG                | CTG CAG AAT TCG GAC<br>TGG TCC TTC CGA CCC<br>CAG         | CRACR2A in pCDNA3.1 myc<br>his vector                                           |
| pEGFP-C1-CRACR2A                                                      | AGA TCT CGA GCT ATG<br>GCT GCC CCT GAC GGG<br>AGG         | GCA GAA TTC TCA GAC<br>TGG TCC TTC CGA CCC                | CRACR2A in pCDNA3.1 myc<br>his vector                                           |
| pmCherry-N1-CRACR2A                                                   |                                                           |                                                           | Cut the CRACR2A fragment<br>from pEGFP-N1-CRACR2A<br>and ligate to pmCherry-N1. |
| pEYFP-N1-STIM1                                                        | CGC CTC GAG ATG GAG<br>GTA TGC GTC CGT CTT                | CTG CAG AAT TCG CTT<br>CTT AAG AGG CTT CTT<br>AAA         | STIM1 in pcDNA3.1 vector                                                        |
| pmCherry-N1-STIM1                                                     |                                                           |                                                           | Cut the STIM1 fragment from<br>pEYFP-N1-STIM1 and ligate<br>to pmCherry-N1.     |
| CRACR2A $\Delta$ N (deletion of first 118<br>amino acids)             | GCC CTC GAG ATG AGC<br>CAG AAT AAC CCA AGT<br>CAG         | GTC AGC GGC CGC GAC<br>TGG TCC TTC CGA CCC<br>CAG         | CRACR2A in pCDNA3.1 myc<br>his vector                                           |
| CRACR2A $\Delta$ C (deletion of last 128<br>amino acids)              | CGC CTC GAG ATG GCT<br>GCC CCT GAC GGG AGG                | GTC AGC GGC CGC TTC<br>GCC CAT GTC GCC CAG<br>ATC         | CRACR2A in pCDNA3.1 myc<br>his vector                                           |
| CRACR2A <sup>63DAE&gt;AAA</sup><br>(CRACR2A <sup>EF1Mut</sup> )       | TTC TTT CAG ACC TGT<br>GCT GCT GCA GGC AAG<br>GGC TTC ATC | GAT GAA GCC CTT GCC<br>TGC AGC AGC ACA GGT<br>CTG AAA GAA | CRACR2A in pCDNA3.1 myc<br>his vector                                           |
| CRACR2A <sup>97DAD&gt;AAA</sup>                                       | GTG TTT GAT GCC CTG<br>GCT GCT GCT GGC AAT<br>GGC TAT CTG | CAG ATA GCC ATT GCC<br>AGC AGC AGC CAG GGC<br>ATC AAA CAC | Site directed mutagenesis<br>(SDM) using WT CRACR2A<br>cDNA as PCR template     |
| CRACR2A <sup>E108Q</sup>                                              | TAT CTG ACC CCA CAG<br>CAG TTC ACT ACTGGA<br>TTT          | AAA TCCAGT AGT GAA<br>CTG CTG TGG GGT CAG<br>ATA          | SDM using WT CRACR2A<br>cDNA as PCR template                                    |
| CRACR2A <sup>97DAD&gt;AAA,E108Q</sup><br>(CRACR2A <sup>EF2MUT</sup> ) | TAT CTG ACC CCA CAG<br>CAG TTC ACT ACTGGA<br>TTT          | AAA TCCAGT AGT GAA<br>CTG CTG TGG GGT CAG<br>ATA          | SDM using<br>CRACR2A <sup>97DAD&gt;AAA</sup> cDNA as<br>PCR template            |
| pGEX 4T-1 CRACR2A                                                     | CGC GAA TTC ATG GCT<br>GCC CCT GAC GGG AGG                | GCG CTC GAG GAC TGG<br>TCC TTC CGA CCC CAG                | CRACR2A in pCDNA3.1 myc<br>his vector                                           |
| pGEX4T-1 WT Orai1 N-terminal<br>fragment (amino acids 64-98)          | CCG GAA TTC ATG AGC<br>CTC AAC GAG CAC TCC                | CCG CTC GAG GCC GGA<br>GAG CAG AGC CGA GGT                | pcDNA3.1 myc his-hOrai1                                                         |
| PCR of human CRACR2A                                                  | CTT CAG CCA GAA TAA<br>CCC AAG TCA GG                     | TTT GGG CTC CAA GTC<br>TGT CCA TCA                        |                                                                                 |
| PCR of human CRACR2B                                                  | CTG ATG AGG CCC AGG<br>AGG AGG A                          | AGC CTC CTT GTC ACA<br>CAG CAG AAA                        |                                                                                 |
| PCR of human GAPDH                                                    | ATC GTG GAA GGA CTC<br>ATG ACC ACA                        | AGA GGC AGG GAT GAT<br>GTT CTG GA                         |                                                                                 |
| PCR of mouse CRACR2A                                                  | AGA ACG AAC TGG AAT<br>GTG CCC TCA                        | TCC TCT GCT TCT GAT<br>TGA GTC GCT                        |                                                                                 |
| PCR of mouse CRACR2B                                                  | GCA GGA GCA AAC CCA<br>AAG AGA TGT                        | AAT AGC TAG AGC CTT<br>CCT GTG GCT                        |                                                                                 |
| PCR of mouse GAPDH                                                    | TGG AGA TTG TTG CCA<br>TCA ACG ACC C                      | TAG ACT CCA CGA CAT<br>ACT CAG CAC CG                     |                                                                                 |
